# Supplementary material
Source: PubMed Central journal article supplement (PMC4395890)
Supplement: supp_WNL.0000000000001437_Supplementary_Table_e-1.pdf [file supp_WNL.0000000000001437_Supplementary_Table_e-1.pdf]

**Supplementary Table e-1.** Cumulative incidence of MCI in the 5 years following baseline assessment, obtained in groups defined by quartiles of the cross-validated risk score from the augmented clinical model that included APOE ε4 carrier status. Estimates are shown as percentages, and were obtained while accounting for the competing risk of death for the selected baseline ages for men and women.

|                      |         | Cumulative incidence of MCI |         |         |         |         |
|----------------------|---------|-----------------------------|---------|---------|---------|---------|
| <b>Woman, age 70</b> |         | 1 year                      | 2 years | 3 years | 4 years | 5 years |
| Risk score           | < 38    | 0.5                         | 1       | 1.1     | 2.2     | 3.4     |
|                      | 38 – 49 | 1.1                         | 2       | 2.3     | 4.5     | 6.9     |
|                      | 50 – 62 | 2.1                         | 3.6     | 4.2     | 8.1     | 12.4    |
|                      | 63+     | 3.6                         | 6.2     | 7.1     | 13.5    | 20.2    |
| <b>Woman, age 75</b> |         | 1 year                      | 2 years | 3 years | 4 years | 5 years |
| Risk score           | < 38    | 0.8                         | 1.5     | 1.7     | 3.4     | 5.2     |
|                      | 38 – 49 | 1.8                         | 3.1     | 3.5     | 6.8     | 10.4    |
|                      | 50 – 62 | 3.3                         | 5.6     | 6.4     | 12.1    | 18.1    |
|                      | 63+     | 5.5                         | 9.4     | 10.7    | 19.8    | 28.9    |
| <b>Woman, age 80</b> |         | 1 year                      | 2 years | 3 years | 4 years | 5 years |
| Risk score           | < 38    | 1.8                         | 3.2     | 5       | 8.8     | 12.6    |
|                      | 38 – 49 | 3.7                         | 6.5     | 10.1    | 17.2    | 24.1    |
|                      | 50 – 62 | 6.8                         | 11.7    | 17.9    | 29.2    | 39      |
|                      | 63+     | 11.4                        | 19.1    | 28.6    | 44.6    | 57.1    |
| <b>Woman, age 85</b> |         | 1 year                      | 2 years | 3 years | 4 years | 5 years |
| Risk score           | < 38    | 2.8                         | 4.9     | 7.7     | 13.1    | 18.5    |
|                      | 38 – 49 | 5.8                         | 9.8     | 15.1    | 24.7    | 33.1    |
|                      | 50 – 62 | 10.4                        | 17.3    | 25.9    | 39.6    | 49.8    |
|                      | 63+     | 17.1                        | 27.8    | 40.1    | 57.9    | 69      |
| <b>Man, age 70</b>   |         | 1 year                      | 2 years | 3 years | 4 years | 5 years |
| Risk score           | < 27    | 1.4                         | 2.4     | 3.2     | 4.5     | 6.3     |
|                      | 18 – 38 | 2.9                         | 4.9     | 6.6     | 9.1     | 12.5    |
|                      | 39 – 53 | 5.3                         | 8.9     | 11.8    | 16.2    | 21.6    |
|                      | 54+     | 8.8                         | 14.7    | 19.3    | 26      | 34.1    |
| <b>Man, age 75</b>   |         | 1 year                      | 2 years | 3 years | 4 years | 5 years |
| Risk score           | < 27    | 2.2                         | 3.7     | 4.9     | 6.9     | 9.4     |
|                      | 18 – 38 | 4.5                         | 7.5     | 9.9     | 13.6    | 18.2    |
|                      | 39 – 53 | 8.1                         | 13.4    | 17.5    | 23.4    | 30.2    |
|                      | 54+     | 13.4                        | 21.8    | 28      | 36.6    | 46.1    |
| <b>Man, age 80</b>   |         | 1 year                      | 2 years | 3 years | 4 years | 5 years |
| Risk score           | < 27    | 2.4                         | 4       | 4.6     | 7       | 9.5     |
|                      | 18 – 38 | 4.8                         | 8       | 9.2     | 13.8    | 18.3    |
|                      | 39 – 53 | 8.8                         | 14.3    | 16.3    | 23.6    | 30.1    |
|                      | 54+     | 14.5                        | 23.1    | 26.2    | 36.9    | 46      |
| <b>Man, age 85</b>   |         | 1 year                      | 2 years | 3 years | 4 years | 5 years |
| Risk score           | < 27    | 3.6                         | 6       | 7       | 10.4    | 12.5    |
|                      | 18 – 38 | 7.4                         | 12      | 13.7    | 19.7    | 25.8    |
|                      | 39 – 53 | 13.4                        | 20.7    | 23.4    | 31.9    | 36.9    |
|                      | 54+     | 21.7                        | 32.9    | 36.7    | 48.4    | 60.1    |
